# Supplementary material
Source: PubMed Central journal article supplement (PMC7250715)
Supplement: NIHMS1061544-supplement-Supp_info.pdf [file NIHMS1061544-supplement-Supp_info.pdf]

**SUPPLEMENTARY FILE**

**AN OPEN LABEL, DOSE ESCALATION STUDY TO ASSESS THE SAFETY AND EFFICACY OF IL-22 AGONIST F-652 IN PATIENTS WITH ALCOHOLIC HEPATITIS**

Juan P. Arab<sup>1,2</sup>, Tejasav S. Sehrawat<sup>1</sup>, Douglas A. Simonetto<sup>1</sup>, Vikas K. Verma<sup>1</sup>, Dechun Feng<sup>3</sup>, Tom Tang<sup>4</sup>, Kevin Dreyer<sup>4</sup>, Xiaoqiang Yan<sup>4</sup>, William L. Daley<sup>4</sup>, Arun Sanyal<sup>5</sup>, Naga Chalasani<sup>6</sup>, Svetlana Radaeva<sup>7</sup>, Liu Yang<sup>8</sup>, Hugo Vargas<sup>9</sup>, Mauricio Ibacache<sup>10</sup>, Bin Gao<sup>3</sup>, Gregory J. Gores<sup>1</sup>, Harmeet Malhi<sup>1</sup>, Patrick S. Kamath<sup>1</sup>, Vijay H. Shah<sup>1</sup>

<sup>1</sup>*Division of Gastroenterology and Hepatology, Mayo Clinic, Rochester, MN, USA.*

<sup>2</sup>*Departamento de Gastroenterología, Escuela de Medicina, Pontificia Universidad Católica de Chile, Santiago, CHILE*

<sup>3</sup>*Laboratory of Liver Diseases, National Institute on Alcohol Abuse and Alcoholism, National Institutes of Health, Bethesda, MD, USA.*

<sup>4</sup>*Generon Corporation Ltd. Shanghai, China.*

<sup>5</sup>*Division of Gastroenterology, Hepatology and Nutrition, Department of Internal Medicine, Virginia Commonwealth University, Richmond, VA, USA.*

<sup>6</sup>*Indiana University School of Medicine, Indianapolis, IN, USA.*

<sup>7</sup>*National Institute on Alcohol Abuse and Alcoholism, Bethesda, MD, USA.*

<sup>8</sup>*Division of Gastroenterology and Hepatology, Mayo Clinic, Jacksonville, FL, USA.*

<sup>9</sup>*Division of Gastroenterology and Hepatology, Mayo Clinic, Scottsdale, AZ, USA.*

<sup>10</sup>*División Anestesiología, Escuela de Medicina, Pontificia Universidad Católica de Chile, Santiago, CHILE.*

**TABLE OF CONTENTS**

Page 2: Supplementary figure 1

Page 3: Supplementary table 1

Pages 4: Supplementary table 2

Pages 5: Supplementary table 3

Pages 6-7: Supplementary table 4

Page 8: Supplementary table 5

Pages 9-10: Supplementary table 6

Pages 11-12: Supplementary table 7

## Supplementary Figure 1

**Clinical characteristics of the F-652 cohort according to dose of the administered drug at baseline, day 28 and day 42.** (A) A trend in reduction of MELD score was evident at all three doses of 10  $\mu\text{g}/\text{kg}$ , 30  $\mu\text{g}/\text{kg}$  and 45  $\mu\text{g}/\text{kg}$ ; (B) A trend in reduction of bilirubin was evident at all three doses of 10  $\mu\text{g}/\text{kg}$ , 30  $\mu\text{g}/\text{kg}$  and 45  $\mu\text{g}/\text{kg}$ ; (C) Leukocytes count remained unchanged across the cohort at follow up days 28 and 42. (D) MELD score reduction at day 0, 28 and 42. (E) Total bilirubin decreased at day 28 and 42 compared to day 0. (F) Total bilirubin decreased at day 7 compared to day 0.

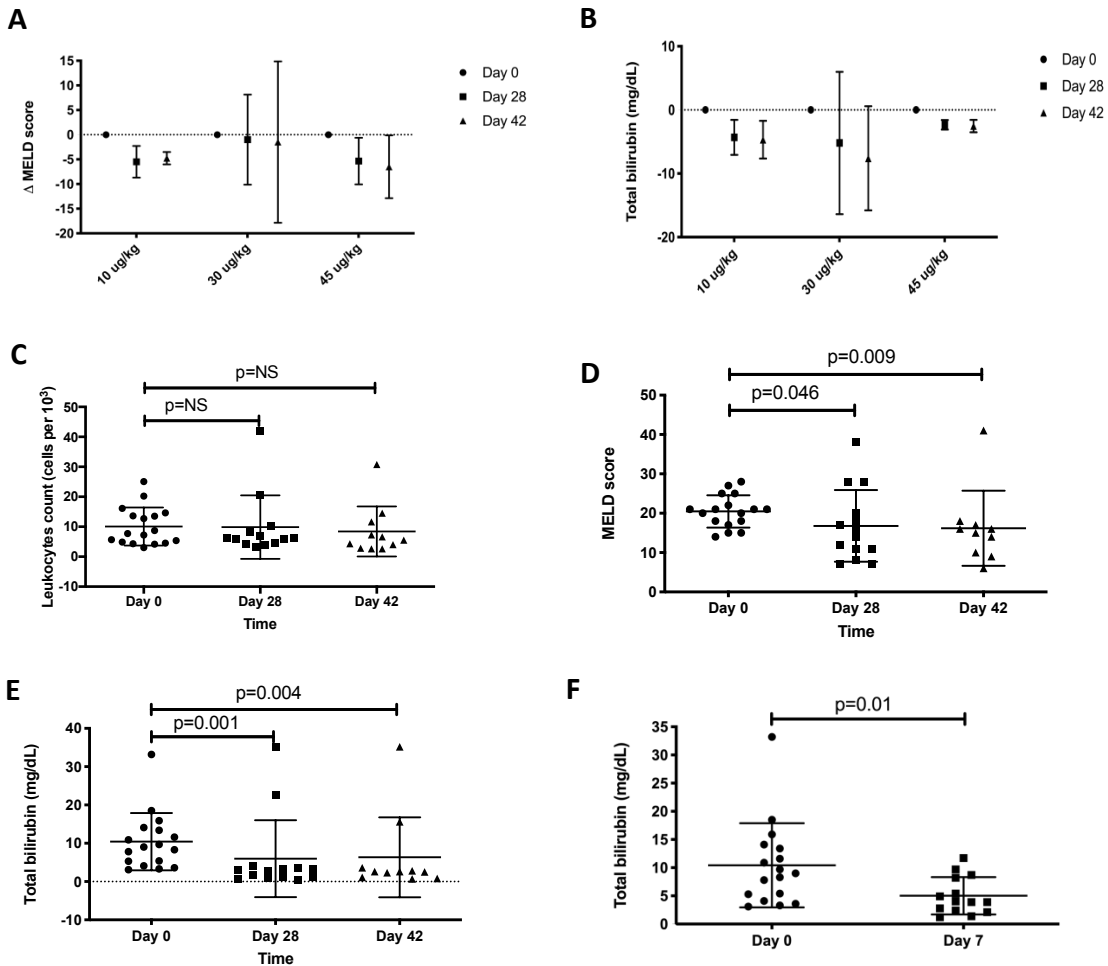

**Supplementary Table 1.** Summary of pharmacologic characteristics of F-652.

| PK                       | Dose                          | Parameter                      | Mean (±SD)                     | Mean (Min-Max)   |  |
|--------------------------|-------------------------------|--------------------------------|--------------------------------|------------------|--|
| <b>Day 1</b>             | 10 µg/kg                      | AUC <sub>0-t</sub> (h*ng/mL)   | 6290 (±1430)                   |                  |  |
|                          |                               | C <sub>max</sub> (ng/mL)       | 125 (±33.2)                    |                  |  |
|                          |                               | C <sub>last</sub> (ng/mL)      | 53.4 (±15.8)                   |                  |  |
|                          |                               | T <sub>max</sub> (h)           |                                | 72.0 (68.6-75.5) |  |
|                          |                               | T <sub>last</sub> (h)          |                                | 6.22 (5.25-8.00) |  |
|                          |                               |                                |                                |                  |  |
|                          | 30 µg/kg                      | AUC <sub>0-t</sub> (h*ng/mL)   | 23200 (±11400)                 |                  |  |
|                          |                               | C <sub>max</sub> (ng/mL)       | 450 (±159)                     |                  |  |
|                          |                               | C <sub>last</sub> (ng/mL)      | 257 (±119)                     |                  |  |
|                          |                               | T <sub>max</sub> (h)           |                                | 72.2 (65.1-76.4) |  |
|                          |                               | T <sub>last</sub> (h)          |                                | 7.75 (4.72-75.4) |  |
|                          |                               |                                |                                |                  |  |
|                          | 45 µg/kg                      | AUC <sub>0-t</sub> (h*ng/mL)   | 43900 (±9020)                  |                  |  |
|                          |                               | C <sub>max</sub> (ng/mL)       | 1160 (±1100)                   |                  |  |
|                          |                               | C <sub>last</sub> (ng/mL)      | 442 (±175)                     |                  |  |
| T <sub>max</sub> (h)     |                               |                                | 72.1 (70.1-75.0)               |                  |  |
| T <sub>last</sub> (h)    |                               |                                | 7.50 (1.00-7.75)               |                  |  |
|                          |                               |                                |                                |                  |  |
| <b>Day 7</b>             | 10 µg/kg                      | AUC <sub>0-t</sub> (h*ng/mL)   | 7510 (±6540)                   |                  |  |
|                          |                               | AUC <sub>0-inf</sub> (h*ng/mL) | 4890 (±1870)                   |                  |  |
|                          |                               | AUC <sub>0-72</sub> (h*ng/mL)  | 2300 (±304)                    |                  |  |
|                          |                               | C <sub>last</sub> (ng/mL)      | 14.0 (±9.26)                   |                  |  |
|                          |                               | C <sub>max</sub> (ng/mL)       | 75.1 (±17.4)                   |                  |  |
|                          |                               | Residual area (%)              | 22.2 (±3.49)                   |                  |  |
|                          |                               | K <sub>el</sub> (1/h)          | 0.0100 (±0.00828)              |                  |  |
|                          |                               | T <sub>½</sub> (h)             | 105 (±86.3)                    |                  |  |
|                          |                               | V <sub>z</sub> (L)             | 18.7 (±4.41)                   |                  |  |
|                          |                               | Cl (L/h)                       | 0.169 (±0.110)                 |                  |  |
|                          |                               | T <sub>last</sub> (h)          |                                | 316 (93.3-647)   |  |
|                          |                               | T <sub>max</sub> (h)           |                                | 6.18 (5.43-7.58) |  |
|                          |                               |                                |                                |                  |  |
|                          |                               | 30 µg/kg                       | AUC <sub>0-t</sub> (h*ng/mL)   | 65400 (±36700)   |  |
|                          |                               |                                | AUC <sub>0-inf</sub> (h*ng/mL) | 69700 (±37000)   |  |
|                          | AUC <sub>0-72</sub> (h*ng/mL) |                                | 16600 (±4490)                  |                  |  |
|                          | C <sub>last</sub> (ng/mL)     |                                | 17.4 (±7.68)                   |                  |  |
|                          | C <sub>max</sub> (ng/mL)      |                                | 405 (±148)                     |                  |  |
|                          | Residual area (%)             |                                | 7.10 (±2.73)                   |                  |  |
|                          | K <sub>el</sub> (1/h)         |                                | 0.00430 (±0.00255)             |                  |  |
|                          | T <sub>½</sub> (h)            |                                | 196 (±87.6)                    |                  |  |
|                          | V <sub>z</sub> (L)            |                                | 10.2 (±3.37)                   |                  |  |
|                          | Cl (L/h)                      |                                | 0.0386 (±0.00910)              |                  |  |
|                          | T <sub>last</sub> (h)         |                                |                                | 982 (310-986)    |  |
|                          | T <sub>max</sub> (h)          |                                |                                | 8.27 (4.88-22.4) |  |
|                          |                               |                                |                                |                  |  |
|                          | 45 µg/kg                      |                                | AUC <sub>0-t</sub> (h*ng/mL)   | 122000 (±69400)  |  |
|                          |                               |                                | AUC <sub>0-inf</sub> (h*ng/mL) | 108000 (±90800)  |  |
|                          |                               | AUC <sub>0-72</sub> (h*ng/mL)  | 33700 (±11200)                 |                  |  |
|                          |                               | C <sub>last</sub> (ng/mL)      | 179 (±283)                     |                  |  |
| C <sub>max</sub> (ng/mL) |                               | 715 (±191)                     |                                |                  |  |
| Residual area (%)        |                               | 4.10 (±0.151)                  |                                |                  |  |
| K <sub>el</sub> (1/h)    |                               | 0.00354 (±0.000144)            |                                |                  |  |
| T <sub>½</sub> (h)       |                               | 196 (±7.97)                    |                                |                  |  |
| V <sub>z</sub> (L)       |                               | 16.1 (±13.7)                   |                                |                  |  |
| Cl (L/h)                 |                               | 0.0559 (±0.0463)               |                                |                  |  |
| T <sub>last</sub> (h)    |                               |                                | 818 (314-822)                  |                  |  |
| T <sub>max</sub> (h)     |                               |                                | 7.75 (1.03-8.33)               |                  |  |
|                          |                               |                                |                                |                  |  |

**Supplementary Table 2.** Dose proportionality evaluation for F-652.

| <b>Dose Proportionality</b>              |                          |                                           |                        |                                         |
|------------------------------------------|--------------------------|-------------------------------------------|------------------------|-----------------------------------------|
| <b>Day 1</b>                             | <b>AUC<sub>0-t</sub></b> | <b>AUC<sub>0-t</sub><br/>(normalized)</b> | <b>C<sub>max</sub></b> | <b>C<sub>max</sub><br/>(normalized)</b> |
| 10 µg/kg to 30 µg/kg (3-fold increase)   | 3.7                      | 1.01                                      | 3.6                    | 1.02                                    |
| 10 µg/kg to 45 µg/kg (4,5-fold increase) | 6.97                     | 1.2                                       | 9.28                   | 1.67                                    |
|                                          |                          |                                           |                        |                                         |
| <b>Day 7</b>                             |                          |                                           |                        |                                         |
| 10 µg/kg to 30 µg/kg (3-fold increase)   | 8.7                      | 2.77                                      | 5.4                    | 1.78                                    |
| 10 µg/kg to 45 µg/kg (4,5-fold increase) | 16.2                     | 3.46                                      | 9.5                    | 1.92                                    |

**Supplementary Table 3.** Accumulation ratios for F-652.

| <b>Parameter</b>    | <b>Dose</b> | <b>Ratio</b> |
|---------------------|-------------|--------------|
| AUC <sub>0-t</sub>  | 10 µg/kg    | 1.19         |
|                     | 30 µg/kg    | 2.81         |
|                     | 45 µg/kg    | 2.77         |
| AUC <sub>0-72</sub> | 10 µg/kg    | 0.42         |
|                     | 30 µg/kg    | 0.77         |
|                     | 45 µg/kg    | 0.79         |
| C <sub>max</sub>    | 10 µg/kg    | 0.6          |
|                     | 30 µg/kg    | 0.9          |
|                     | 45 µg/kg    | 0.62         |

**Supplementary Table 4.** Propensity score matching analysis for F-652 treatment cohort vs. historical retrospective and prospective cohorts ensuring accurate and non-biased comparison of data between the treatment and control groups. Means are more comparable in the matched cohort and eQQ (quartile differences) values are smaller, both indicating better matching of comparison groups when compared to unmatched cohorts.

|                                                             | Means<br>(F-652) | Means<br>(historical<br>cohort) | SD<br>(historical<br>cohort) | Mean<br>difference | eQQ<br>median | eQQ<br>mean | eQQ<br>maximum | p-value (vs. F-<br>652 cohort) |
|-------------------------------------------------------------|------------------|---------------------------------|------------------------------|--------------------|---------------|-------------|----------------|--------------------------------|
| <b>F-652 vs. retrospective cohort (unmatched data)</b>      |                  |                                 |                              |                    |               |             |                |                                |
| Distance                                                    | 0.4498           | 0.2078                          | 0.1685                       | 0.2420             | 0.2409        | 0.2359      | 0.3979         | -                              |
| MELD                                                        | 20.3529          | 26.6222                         | 6.9553                       | -6.2693            | 5.0000        | 6.4118      | 20             | 0.001                          |
| Age                                                         | 48.9412          | 48.1333                         | 11.4765                      | 0.8078             | 2.0000        | 3.1176      | 10             | 0.8                            |
| Sex (males)                                                 | 0.7059           | 0.6889                          | 0.4682                       | 0.0170             | 0.0000        | 0.0588      | 1.0000         | 0.9                            |
| <b>F-652 vs. retrospective cohort (matched data)</b>        |                  |                                 |                              |                    |               |             |                |                                |
| Distance                                                    | 0.4498           | 0.3507                          | 0.1536                       | 0.0992             | 0.073         | 0.0999      | 0.3242         | -                              |
| MELD                                                        | 20.3529          | 21.8824                         | 2.5466                       | -1.5294            | 1.000         | 2.0000      | 5.0000         | 0.21                           |
| Age                                                         | 48.9412          | 50.1765                         | 9.9451                       | -1.2353            | 4.000         | 2.7647      | 4.0000         | 0.72                           |
| Sex (males)                                                 | 0.7059           | 0.7647                          | 0.4372                       | -0.0588            | 0.000         | 0.0588      | 1.0000         | 0.7                            |
| <b>F-652 vs. prospective cohort (unmatched data)</b>        |                  |                                 |                              |                    |               |             |                |                                |
| Distance                                                    | 0.4631           | 0.3380                          | 0.1867                       | 0.1251             | 0.1381        | 0.1393      | 0.2254         | -                              |
| MELD                                                        | 20.3529          | 24.5926                         | 7.3968                       | -4.2397            | 4.0000        | 4.5882      | 15.0000        | 0.04                           |
| Age                                                         | 48.9412          | 49.0000                         | 14.0165                      | -0.0588            | 4.0000        | 4.7059      | 11.0000        | 0.99                           |
| Sex (males)                                                 | 0.7059           | 0.5926                          | 0.5007                       | 0.1133             | 0.0000        | 0.1176      | 1.0000         | 0.44                           |
| <b>F-652 vs. prospective cohort (matched data)</b>          |                  |                                 |                              |                    |               |             |                |                                |
| Distance                                                    | 0.4631           | 0.4395                          | 0.1530                       | 0.0236             | 0.0336        | 0.0320      | 0.0679         | -                              |
| MELD                                                        | 20.3529          | 21.4118                         | 5.7777                       | -1.0588            | 2.0000        | 2.0000      | 4.0000         | 0.55                           |
| Age                                                         | 48.9412          | 47.0000                         | 13.6657                      | 1.9412             | 4.0000        | 4.6471      | 9.0000         | 0.64                           |
| Sex (males)                                                 | 0.7059           | 0.7059                          | 0.4697                       | 0.0000             | 0.0000        | 0.0000      | 0.0000         | 1.0                            |
| <b>F-652 vs. steroid treated AH cohort (unmatched data)</b> |                  |                                 |                              |                    |               |             |                |                                |

|                                                           |         |         |         |         |        |        |         |       |
|-----------------------------------------------------------|---------|---------|---------|---------|--------|--------|---------|-------|
| Distance                                                  | 0.6059  | 0.3350  | 0.1975  | 0.2709  | 0.3254 | 0.2855 | 0.4161  | -     |
| MELD                                                      | 20.3529 | 24.400  | 2.7796  | -4.0471 | 4.0000 | 3.8235 | 6.0000  | 0.002 |
| Age                                                       | 48.9412 | 45.700  | 11.7791 | 3.2412  | 5.0000 | 4.4706 | 10.0000 | 0.39  |
| Sex (males)                                               | 0.7059  | 0.600   | 0.5026  | 0.1059  | 0.0000 | 0.1176 | 1.0000  | 0.52  |
| <b>F-652 vs. steroid treated AH cohort (matched data)</b> |         |         |         |         |        |        |         |       |
| Distance                                                  | 0.6059  | 0.3721  | 0.1911  | 0.2338  | 0.2743 | 0.2353 | 0.3268  | -     |
| MELD                                                      | 20.3529 | 23.8824 | 2.6899  | -3.5294 | 4.0000 | 3.5294 | 6.0000  | 0.006 |
| Age                                                       | 48.9412 | 46.5882 | 12.5900 | 2.3529  | 3.0000 | 3.6471 | 10.0000 | 0.55  |
| Sex (males)                                               | 0.7059  | 0.7059  | 0.4697  | 0.0000  | 0.0000 | 0.0000 | 0.0000  | 1.0   |

**Supplementary Table 5.** Baseline clinical characteristics of propensity score matched controls from three historical cohorts compared against the F-652 treated cohort.

|                     | <b>Retrospective AH Cohort</b> | <b>Prospective AH Cohort</b> | <b>Steroid treated AH Cohort</b> |
|---------------------|--------------------------------|------------------------------|----------------------------------|
| Age                 | 50.94 ± 9.44                   | 47 ± 13.26                   | 46.59 ± 12.21                    |
| Sex (fraction male) | 0.75                           | 0.71                         | 0.71                             |
| MELD                | 21.63 ± 2.32                   | 21.41 ± 5.61                 | 23.88 ± 2.61                     |
| Creatinine (mg/dL)  | 0.66 ± 0.24                    | 0.75 ± 0.22                  | 0.82 ± 0.36                      |
| INR                 | 1.6 ± 0.18                     | n/a                          | 1.88 ± 0.47                      |
| Bilirubin (mg/dL)   | 17.57 ± 8.61                   | 15.2 ± 9.18                  | 16.01 ± 7.02                     |
| PT (sec)            | 16.81 ± 2.37                   | 18.43 ± 7.02                 | 20.92 ± 4.36                     |



**Supplementary Table 6.** Multiplex analysis for serum levels of proinflammatory and regenerative biomarkers (fold change over baseline) at day 28 and 42.

| Biomarkers   | Day 0    | Day 28      | p-value | Day 42      | p-value |
|--------------|----------|-------------|---------|-------------|---------|
| Angioproten2 | 1 ± 0.06 | 1.02 ± 0.11 | 0.9924  | 1.15 ± 0.11 | 0.6609  |
| CCL17        | 1 ± 0.18 | 0.90 ± 0.09 | 0.8284  | 0.83 ± 0.09 | 0.5907  |
| CCL20        | 1 ± 0.08 | 0.66 ± 0.14 | 0.1471  | 0.62 ± 0.11 | 0.0955  |
| CCL3         | 1 ± 0.07 | 0.96 ± 0.09 | 0.9698  | 1.13 ± 0.11 | 0.7307  |
| CCL4         | 1 ± 0.07 | 1.11 ± 0.06 | 0.7971  | 1.19 ± 0.09 | 0.5217  |
| CCL5         | 1 ± 0.08 | 0.77 ± 0.05 | 0.3938  | 0.74 ± 0.06 | 0.3102  |
| CRP          | 1 ± 0.07 | 0.64 ± 0.08 | 0.1191  | 0.41 ± 0.06 | 0.0053  |
| CXCL1        | 1 ± 0.08 | 1.16 ± 0.16 | 0.6257  | 1.04 ± 0.08 | 0.9698  |
| CXCL10       | 1 ± 0.59 | 0.90 ± 0.09 | 0.8284  | 0.85 ± 0.05 | 0.6609  |
| CXCL11       | 1 ± 0.15 | 0.69 ± 0.06 | 0.1982  | 0.56 ± 0.04 | 0.0465  |
| CXCL5        | 1 ± 0.06 | 2.19 ± 0.28 | <0.0001 | 2.01 ± 0.17 | <0.0001 |
| CXCL9        | 1 ± 0.09 | 1.08 ± 0.10 | 0.8858  | 1.15 ± 0.06 | 0.6609  |
| Eotaxin      | 1 ± 0.12 | 1.13 ± 0.07 | 0.7307  | 1.09 ± 0.08 | 0.8581  |
| FGF-β        | 1 ± 0.08 | 1.24 ± 0.10 | 0.3647  | 1.33 ± 0.08 | 0.1629  |
| G-CSF        | 1 ± 0.12 | 0.96 ± 0.08 | 0.9698  | 1.21 ± 0.12 | 0.4557  |
| HGF          | 1 ± 0.07 | 0.51 ± 0.04 | 0.0239  | 0.60 ± 0.06 | 0.0759  |
| IL-10        | 1 ± 0.07 | 0.67 ± 0.03 | 0.1629  | 0.59 ± 0.03 | 0.0674  |
| IL-1α        | 1 ± 0.18 | 1.57 ± 0.26 | 0.0073  | 3.02 ± 0.36 | <0.0001 |
| IL-27        | 1 ± 0.08 | 1.24 ± 0.10 | 0.3647  | 1.33 ± 0.08 | 0.1629  |
| IL-6         | 1 ± 0.06 | 0.61 ± 0.06 | 0.0852  | 0.80 ± 0.11 | 0.4883  |
| IL-8         | 1 ± 0.07 | 0.45 ± 0.07 | 0.0099  | 0.79 ± 0.16 | 0.4557  |
| MCP-1        | 1 ± 0.08 | 0.75 ± 0.04 | 0.3367  | 0.77 ± 0.05 | 0.3938  |
| MPO          | 1 ± 0.18 | 1.83 ± 0.36 | <0.0001 | 1.49 ± 0.18 | 0.0239  |
| NGAL         | 1 ± 0.30 | 0.75 ± 0.14 | 0.3367  | 1.17 ± 0.18 | 0.5907  |
| PDGF-AA      | 1 ± 0.07 | 1.20 ± 0.08 | 0.4883  | 1.27 ± 0.12 | 0.2850  |
| PDGF-BB      | 1 ± 0.06 | 1.09 ± 0.07 | 0.8581  | 1.15 ± 0.10 | 0.6609  |
| SCF          | 1 ± 0.10 | 1.46 ± 0.16 | 0.0359  | 2.05 ± 0.15 | <0.0001 |
| sFas         | 1 ± 0.06 | 1.05 ± 0.09 | 0.9534  | 1.06 ± 0.09 | 0.9337  |
| sFasL        | 1 ± 0.17 | 0.34 ± 0.02 | 0.0016  | 0.57 ± 0.03 | 0.0528  |
| TNFα         | 1 ± 0.19 | 1.16 ± 0.15 | 0.6257  | 1.05 ± 0.13 | 0.9534  |

CCL17: Chemokine (C-C motif) ligand 17 [also known as TARC]; CCL20: Chemokine (C-C motif) ligand 20 [also known as MIP-3 $\alpha$ ]; CCL3: Chemokine (C-C motif) ligand 3 [also known as MIP-1 $\alpha$ ]; CCL4: Chemokine (C-C motif) ligand 4 [also known as MIP-1 $\beta$ ]; CCL5: Chemokine (C-C motif) ligand 5 [also known as RANTES]; CRP: C-reactive protein; CXCL1: C-X-C motif chemokine 1 (also known as GRO $\alpha$ ); CXCL10: C-X-C motif chemokine 10 (also known as IP-10); CXCL11: C-X-C motif chemokine 11 (also known as I-TAC); CXCL5: C-X-C motif chemokine 5 (also known as ENA-78); CXCL9: C-X-C motif chemokine 9 (also known as MIG); FGF- $\beta$ : fibroblast growth factor  $\beta$ ; G-CSF: Granulocyte colony-stimulating factor; HGF: Hepatocyte growth factor; IL-10: Interleukin-10; IL-1 $\alpha$ : Interleukin-1 $\alpha$ ; IL-27: Interleukin-27; IL-6: Interleukin-6; IL-8: Interleukin-8; MCP-1: Monocyte Chemoattractant Protein-1; MPO: Myeloperoxidase; NGAL: Neutrophil gelatinase-associated lipocalin; PDGF: Platelet-derived growth factor; SCF: Stem cell factor; TNF $\alpha$ : Tumor necrosis factor  $\alpha$ .

**Supplementary Table 7.** Multiplex analyses for serum levels of proinflammatory and regenerative biomarkers at day 42 divided by dose.

|              | Percentage of baseline value at day 42 |               |               |           |
|--------------|----------------------------------------|---------------|---------------|-----------|
|              | 10 µg/kg dose                          | 30 µg/kg dose | 45 µg/kg dose | All doses |
| Angioproten2 | 50.4                                   | 76.8          | 249.2         | 114.9     |
| CCL17        | 48.9                                   | 257.1         | 137.7         | 83.1      |
| CCL20        | 13.1                                   | 50.2          | 177.2         | 62.2      |
| CCL3         | 79.6                                   | 199           | 90.5          | 113.2     |
| CCL4         | 78.7                                   | 118.4         | 123.4         | 119.1     |
| CCL5         | 30.4                                   | 170.8         | 119.8         | 74        |
| CRP          | 11.4                                   | 68.1          | 44            | 41.4      |
| CXCL1        | 55.8                                   | 164.7         | 90.2          | 104.4     |
| CXCL10       | 53                                     | 102.9         | 102.7         | 84.8      |
| CXCL11       | 24.8                                   | 202.2         | 31.4          | 55.6      |
| CXCL5        | 112.7                                  | 197.1         | 287.1         | 201.2     |
| CXCL9        | 96.2                                   | 125           | 192.5         | 115.3     |
| Eotaxin      | 67.2                                   | 66.1          | 249.8         | 108.9     |
| FGF-b        | 106.6                                  | 118.1         | 147.2         | 133.4     |
| G-CSF        | 86.3                                   | 203.3         | 72.4          | 121.3     |
| HGF          | 19.7                                   | 41            | 130.2         | 59.9      |
| IL-10        | 65.8                                   | 86.4          | 42.9          | 59.3      |
| IL-1a        | 137.5                                  | 828.3         | 195.5         | 302.4     |
| IL-1b        | 245.2                                  | 625.9         | 63.6          | 150.2     |
| IL-27        | 106.6                                  | 118.1         | 147.2         | 133.4     |
| IL-6         | 26.8                                   | 107.9         | 85.9          | 79.8      |
| IL-8         | 25.4                                   | 25.3          | 215.8         | 79.1      |
| MCP-1        | 36.7                                   | 78.7          | 110.1         | 77.4      |
| MPO          | 5.9                                    | 238.2         | 403.8         | 149.3     |
| NGAL         | 2.6                                    | 503.3         | 1032.2        | 116.9     |
| PDGF-AA      | 41.1                                   | 277           | 113.7         | 127.3     |
| PDGF-BB      | 48.2                                   | 165.4         | 103.7         | 114.6     |
| SCF          | 198                                    | 124.8         | 294.1         | 205.4     |
| sFas         | 55.5                                   | 91.4          | 174.4         | 106.1     |
| sFasL        | 428.7                                  | 98            | 47.6          | 57.3      |
| TNFa         | 214.9                                  | 1165.7        | 32.7          | 105.4     |

CCL17: Chemokine (C-C motif) ligand 17 [also known as TARC]; CCL20: Chemokine (C-C motif) ligand 20 [also known as MIP-3 $\alpha$ ]; CCL3: Chemokine (C-C motif) ligand 3 [also known as MIP-1 $\alpha$ ]; CCL4: Chemokine (C-C motif) ligand 4 [also known as MIP-1 $\beta$ ]; CCL5: Chemokine (C-C motif) ligand 5 [also known as RANTES]; CRP: C-reactive protein; CXCL1: C-X-C motif chemokine 1 (also known as GRO $\alpha$ ); CXCL10: C-X-C motif chemokine 10 (also known as IP-10); CXCL11: C-X-C motif chemokine 11 (also known as I-TAC); CXCL5: C-X-C motif chemokine 5 (also known as ENA-78); CXCL9: C-X-C motif chemokine 9 (also known as MIG); FGF- $\beta$ : fibroblast growth factor  $\beta$ ; G-CSF: Granulocyte colony-stimulating factor; HGF: Hepatocyte growth factor; IL-10: Interleukin-10; IL-1 $\alpha$ : Interleukin-1 $\alpha$ ; IL-27: Interleukin-27; IL-6: Interleukin-6; IL-8: Interleukin-8; MCP-1: Monocyte Chemoattractant Protein-1; MPO: Myeloperoxidase; NGAL: Neutrophil gelatinase-associated lipocalin; PDGF: Platelet-derived growth factor; SCF: Stem cell factor; TNF $\alpha$ : Tumor necrosis factor  $\alpha$ .
